# Supplementary material for: Polarization Angle Dependence of Optical Gain in a Hybrid Structure of Alexa-Flour 488/M13 Bacteriophage
Source: MDPI journal article supplement (doi:10.3390/nano11123309), 2021-12-06

# Supporting information

## S1. How to obtain stripe length dependent gain spectrum

Given the ASE spectrum for various stripe lengths  $I(\hbar\omega, x)$ , light amplification along a one-dimensional optical stripe can be described in terms of gain coefficient  $g(\hbar\omega, x)$ , the spontaneous emission density  $J_{\text{spon}}$  and solid angle of edge emission  $\Omega$ .

$$\frac{dI(\hbar\omega, x)}{dx} = g(\hbar\omega, x) I(\hbar\omega, x) + J_{\text{spon}}\Omega$$

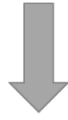

$$g(\hbar\omega, x) = \frac{\text{STEP-2} \quad \frac{dI(\hbar\omega, x)}{dx} \quad \text{STEP-3} \quad - J_{\text{spon}}\Omega}{\text{STEP-1} \quad I(\hbar\omega, x)}$$

As a first step, ASE intensity for stripe length  $I(x)$  can be plotted for a selected spectral energy (or wavelength). If a gain coefficient is positive ( $g > 0$ ), the intensity shows a super-linear increase. On the other hand, the intensity increases linearly for  $g \sim 0$ . In this case, the slope is the spontaneous emission term ( $J\Omega$ ).

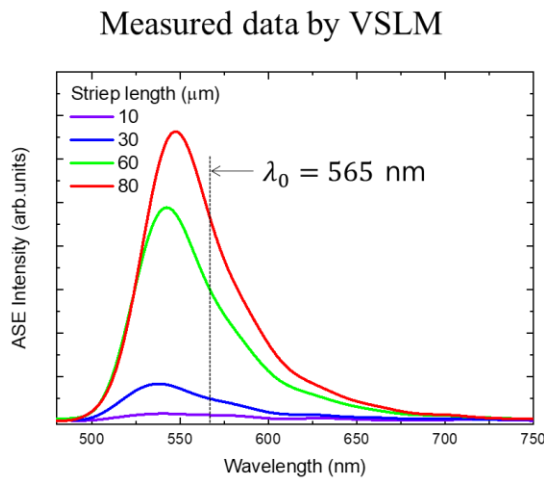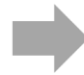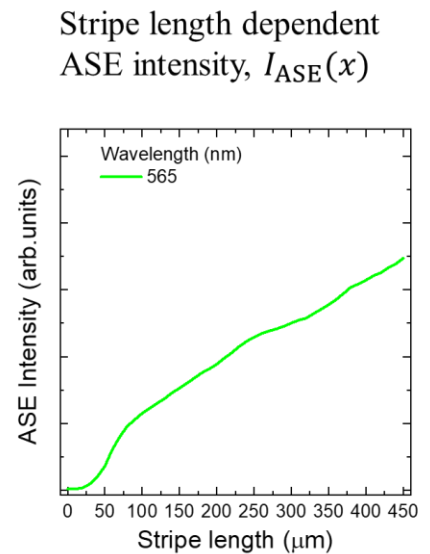

For a second step, we obtained derivative  $\frac{dI(x)}{d\lambda}$  for stripe length, whereby the presence of gain can be noticed, and the linear slope near zero stripe length ( $J\Omega$ ) was also obtained. Finally, a stripe length dependence of the gain coefficient at a specific wavelength  $g(\hbar\omega, x)$  can be obtained by  $(\frac{dI(x)}{d\lambda} - J_{spon}\Omega)/I(x)$ . To obtain a gain spectrum, this calculation process should be repeated for changing wavelength. As a result, this method enables to plot not only a stripe length dependence of gain coefficient at a certain wavelength but also a gain spectrum for different stripe lengths.

Stripe dependent  
gain calculation,  $g(x)$

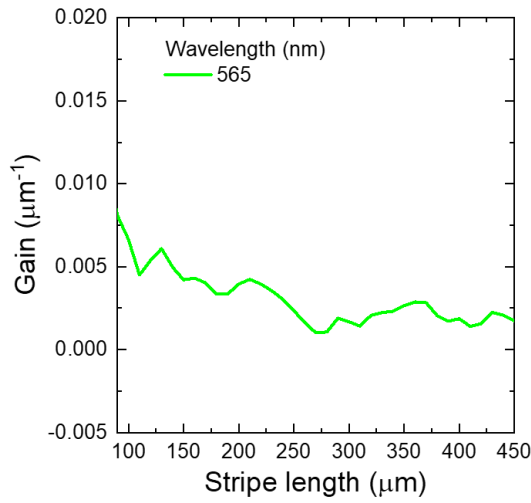

Wavelength dependent  
gain calculation,  $g(\lambda)$

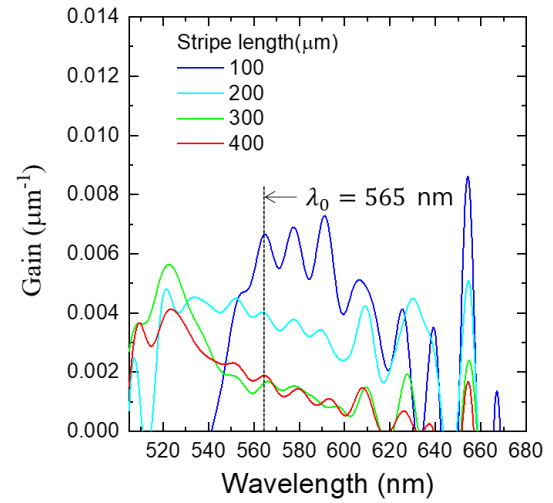

## S2. Estimating an effective cavity length from etalon

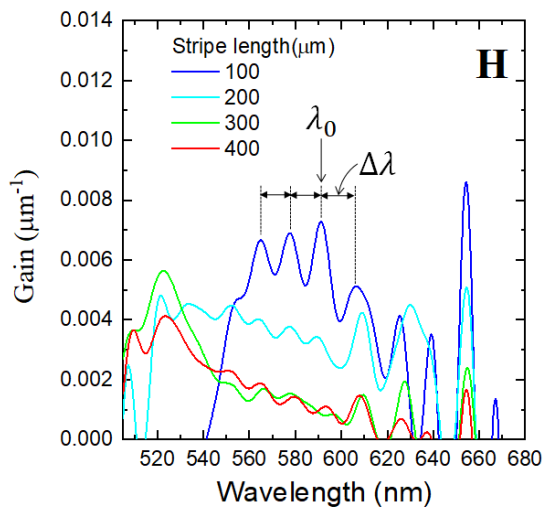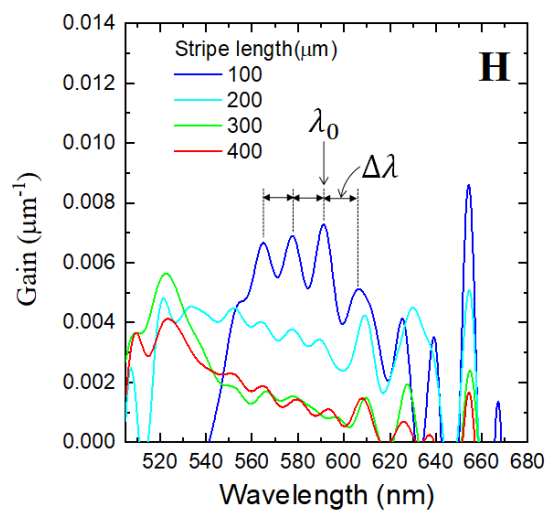

Given the mode spacing ( $\Delta\lambda$ ), measured from the gain spectrum, the effective cavity length ( $L$ ) can be estimated using equation-(5) as introduced in the main manuscript,

$$\Delta\lambda = \frac{\lambda_0^2}{2L(n - \lambda_0 dn/d\lambda)}$$

, where  $n$  is the refractive index at  $\lambda_0$ , and  $L$  is the cavity length.

To measure the refractive index of Alexa flour 488, we used the incidence angle dependence of interference fringes as shown schematically. For a selective monochromatic wavelength, the number of interference fringe change ( $N$ ) was counted by changing the incident angle. Therefore, given the wavelength separation ( $\Delta\lambda$ ), emission wavelength ( $\lambda_0$ ), and refractive index spectrum, the cavity length ( $L$ ) can be estimated. In the wavelength of our ASE spectrum, the refractive index can be considered a constant of  $n \sim 1.34$  with a dispersion  $\frac{dn}{d\lambda} \sim -9.5$ .

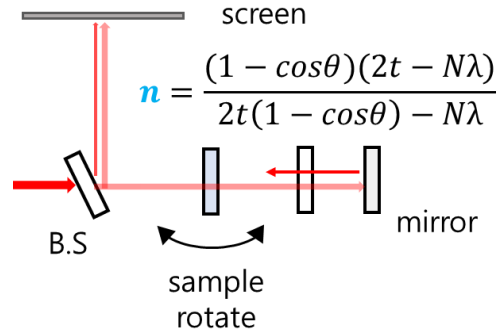

Supplement: s1 [file s1]
